# Supplementary material for: A Surveillance Mechanism Ensures Repair of DNA Lesions during Zygotic Reprogramming
Source: PubMed Central journal article supplement (PMC5161750; doi:10.1016/j.cell.2016.11.009), 2016-12-15
Supplement: mmc1.pdf [file mmc1.pdf]

**Cell, Volume 167**

**Supplemental Information**

**A Surveillance Mechanism Ensures Repair  
of DNA Lesions during Zygotic Reprogramming**

**Sabrina Ladstätter and Kikuë Tachibana-Konwalski**

**Supplemental Table S1, Related to Figure 2, Figure S3**

**Numbers of mature oocytes isolated from *Scc1<sup>f/f</sup>* and *Scc1<sup>f/f</sup> (Tg)Zp3-Cre (Scc1<sup>A/A</sup>)* female mice.** Mature oocytes are defined by appearance (size, central nucleus, smooth zona pellucida) and timely extrusion of the 1<sup>st</sup> polar body around 10 h post-release from phosphodiesterase inhibitor IBMX.

|              | <i>Scc1<sup>f/f</sup></i> |                   |                    | <i>Scc1<sup>A/A</sup></i> |                   |                    |
|--------------|---------------------------|-------------------|--------------------|---------------------------|-------------------|--------------------|
|              | Number of oocytes         | Number of females | Oocytes per female | Number of oocytes         | Number of females | Oocytes per female |
| Experiment 1 | 24                        | 3                 | 8                  | 23                        | 3                 | 8                  |
| Experiment 2 | 31                        | 4                 | 8                  | 45                        | 5                 | 9                  |
| Experiment 3 | 21                        | 4                 | 5                  | 26                        | 3                 | 9                  |
| Experiment 4 | 21                        | 2                 | 11                 | 47                        | 6                 | 8                  |
| Experiment 5 | 17                        | 2                 | 9                  | 41                        | 5                 | 8                  |
| Experiment 6 | 37                        | 3                 | 12                 | 56                        | 6                 | 9                  |
| Experiment 7 | 24                        | 3                 | 8                  | 29                        | 3                 | 10                 |
| Experiment 8 | 33                        | 3                 | 11                 | 43                        | 4                 | 11                 |
| <b>Total</b> | <b>208</b>                | <b>24</b>         | <b>9 ± 2</b>       | <b>310</b>                | <b>35</b>         | <b>9 ± 1</b>       |

**Supplemental Table S2, Related to Figure 2**

**Numbers of zygotes obtained after natural mating of superovulated female mice.** Zygotes are isolated 17-18 h post-superovulation and scored for formation of visible pronuclei at 20 h post-superovulation.

|              | <i>Sccl<sup>fl</sup></i> |                   |                    | <i>Sccl<sup>A</sup></i> |                   |                    |
|--------------|--------------------------|-------------------|--------------------|-------------------------|-------------------|--------------------|
|              | Number of zygotes        | Number of females | Zygotes per female | Number of zygotes       | Number of females | Zygotes per female |
| Experiment 1 | 48                       | 4                 | 12                 | 34                      | 3                 | 11                 |
| Experiment 2 | 67                       | 8                 | 8                  | 47                      | 5                 | 9                  |
| Experiment 3 | 15                       | 2                 | 8                  | 44                      | 4                 | 11                 |
| Experiment 4 | 25                       | 4                 | 6                  | 49                      | 5                 | 10                 |
| Experiment 5 | 45                       | 6                 | 8                  | 47                      | 6                 | 8                  |
| Experiment 6 | 10                       | 1                 | 10                 | 15                      | 2                 | 8                  |
| Experiment 7 | 33                       | 5                 | 7                  | 37                      | 5                 | 7                  |
| Experiment 8 | 19                       | 3                 | 6                  | 38                      | 5                 | 8                  |
| <b>Total</b> | <b>262</b>               | <b>33</b>         | <b>8 ± 2</b>       | <b>311</b>              | <b>35</b>         | <b>9 ± 2</b>       |
